# Supplementary material for: Real-World Analysis of the Therapeutic Management and Disease Burden in Chronic Myeloid Leukemia Patients with Later Lines in Italy
Source: MDPI journal article supplement (doi:10.3390/jcm11133597), 2022-06-22
Supplement: s1 [file s1]

**Supporting Table S1. List of codes used for identification of patients included in the analysis.**

| <b>TKI</b>                                                                                                                                                                                | <b>ATC codes in force at the time of study period.</b>                           |
|-------------------------------------------------------------------------------------------------------------------------------------------------------------------------------------------|----------------------------------------------------------------------------------|
| Bosutinib                                                                                                                                                                                 | L01XE14                                                                          |
| Dasatinib                                                                                                                                                                                 | L01XE06                                                                          |
| Imatinib                                                                                                                                                                                  | L01XE01                                                                          |
| Nilotinib                                                                                                                                                                                 | L01XE08                                                                          |
| Ponatinib                                                                                                                                                                                 | L01XE24                                                                          |
| <b>Hospitalization discharge diagnosis/<br/>procedures (<i>for patients without nilotinib or<br/>bosutinib prescriptions</i>)</b>                                                         | <b>ICD-9-CM codes</b>                                                            |
| CML                                                                                                                                                                                       | 205.1                                                                            |
| BCR-ABL exam (ICD-9-CM code: 91.36.5, 91.29.4, 91.29.3) without hospitalization (day hospital or regular admission) with main or secondary discharge diagnosis of lymphoid acute leukemia | 91.36.5, 91.29.4, 91.29.3 without lymphoid acute leukemia (ICD-9-CM code: 204.0) |

**Supporting Table S2. List of comorbidities.**

| Diagnosis                                                         | ICD-9-CM codes                           | ATC codes               |
|-------------------------------------------------------------------|------------------------------------------|-------------------------|
| Hypertension                                                      | 401-405                                  | C02, C03, C07, C08, C09 |
| Cardiovascular:                                                   |                                          |                         |
| <i>Ischemic heart disease</i>                                     | 410-414                                  |                         |
| <i>Diseases of pulmonary circulation</i>                          | 415-417                                  |                         |
| <i>Other forms of heart disease</i>                               | 420-429                                  |                         |
| <i>Cerebrovascular disease, arteries, arterioles, capillaries</i> | 430-448                                  |                         |
| <i>Diseases of veins and lymphatics</i>                           | 451-455                                  |                         |
| Pneumonia and preurisy:                                           |                                          |                         |
| <i>Pneumonia and influenza</i>                                    | 480-487                                  |                         |
| <i>COPD and allied conditions</i>                                 | 490-496                                  |                         |
| <i>Other diseases of respiratory system</i>                       | 510-519                                  |                         |
| Gastrointestinal                                                  | 530-538 /555-558 / 560-569;<br>787       |                         |
| Liver                                                             | 570-579; 790.4                           |                         |
| Renal                                                             | 580-589; 593.8; 593.9                    |                         |
| Edema                                                             | 782.3                                    |                         |
| Anemia; thromobocytopenia; neutropenia (blood count alterations)  | 790.0; 280-285; 287.4; 287.5; B03<br>288 |                         |
| Metabolic alterations                                             | 790.2; 250; 272                          | A10, C10                |

**Supporting Table S3. The occurrence of comorbidities during treatment in patients in 2<sup>nd</sup> line stratified by TKI agents**

|                                             | <b>Imatinib</b> | <b>Dasatinib</b> | <b>Nilotinib</b> | <b>Bosutinib</b> | <b>Ponatinib</b> | <b>Overall</b> |
|---------------------------------------------|-----------------|------------------|------------------|------------------|------------------|----------------|
| N. of patients                              | 38              | 201              | 142              | 60               | 50               | 491            |
| Hypertension (n, %)                         | 0 (0.0)         | 20 (10.0)        | 5 (3.5)          | 0 (0.0)          | <4               | 27 (5.5)       |
| Cardiovascular (n, %)                       | <4              | 11 (5.5)         | 9 (6.3)          | <4               | <4               | 28 (5.7)       |
| <i>Ischemic heart disease</i>               | <4              | 4 (2.0)          | 0 (0.0)          | <4               | <4               | 8 (1.6)        |
| <i>Diseases of pulmonary circulation</i>    | 0 (0.0)         | <4               | 0 (0.0)          | <4               | <4               | 4 (0.8)        |
| <i>Other forms of heart disease</i>         | <4              | 15 (7.5)         | <4               | 4 (6.7)          | <4               | 25 (5.1)       |
| <i>Cerebrovascular disease</i>              | <4              | 4 (2.0)          | 5 (3.5)          | <4               | <4               | 13 (2.6)       |
| <i>Diseases of veins and lymphatics</i>     | <4              | 0 (0.0)          | <4               | 0 (0.0)          | <4               | <4             |
| Pneumonia and pleurisy (n, %)               | 0 (0.0)         | 14 (7.0)         | 5 (3.5)          | 6 (10.0)         | <4               | 27 (5.5)       |
| <i>Pneumonia and influenza</i>              | 0 (0.0)         | 4 (2.0)          | <4               | 0 (0.0)          | 0 (0.0)          | 6 (1.2)        |
| <i>COPD and allied conditions</i>           | 0 (0.0)         | 0 (0.0)          | <4               | <4               | 0 (0.0)          | 4 (0.8)        |
| <i>Other diseases of respiratory system</i> | 0 (0.0)         | 13 (6.5)         | 5 (3.5)          | 6 (10.0)         | <4               | 26 (5.3)       |
| Gastrointestinal (n, %)                     | <4              | 5 (2.5)          | 0 (0.0)          | <4               | 0 (0.0)          | 9 (1.8)        |
| Liver (n, %)                                | <4              | <4               | <4               | <4               | <4               | 9 (1.8)        |
| Renal (n, %)                                | <4              | 4 (2.0)          | <4               | 5 (8.3)          | 0 (0.0)          | 13 (2.6)       |
| Edema (n, %)                                | 0 (0.0)         | 0 (0.0)          | 0 (0.0)          | 0 (0.0)          | 0 (0.0)          | 0 (0.0)        |
| Metabolic alteration (n, %)                 | <4              | 16 (8.0)         | 14 (9.9)         | <4               | 0 (0.0)          | 32 (6.5)       |
| Years in treatment (mean, SD)               | 1.7 (1.7)       | 2.5 (1.6)        | 2.6 (1.6)        | 1.4 (1.2)        | 1.5 (1.2)        | 2.2 (1.6)      |

**Supporting Table S4. The occurrence of comorbidities during treatment in patients in 3<sup>rd</sup> line stratified by TKI agents**

|                                             | <b>Imatinib</b> | <b>Dasatinib</b> | <b>Nilotinib</b> | <b>Bosutinib</b> | <b>Ponatinib</b> | <b>Overall</b> |
|---------------------------------------------|-----------------|------------------|------------------|------------------|------------------|----------------|
| N. of patients                              | 38              | 23               | 27               | 24               | 32               | 144            |
| Hypertension (n, %)                         | <4              | <4               | <4               | 0 (0.0)          | <4               | 9 (6.3)        |
| Cardiovascular (n, %)                       | 0 (0.0)         | <4               | <4               | 0 (0.0)          | <4               | 5 (3.5)        |
| <i>Ischemic heart disease</i>               | 0 (0.0)         | <4               | <4               | 0 (0.0)          | <4               | 4 (2.8)        |
| <i>Diseases of pulmonary circulation</i>    | 0 (0.0)         | 0 (0.0)          | 0 (0.0)          | 0 (0.0)          | 0 (0.0)          | 0 (0.0)        |
| <i>Other forms of heart disease</i>         | 0 (0.0)         | <4               | 0 (0.0)          | <4               | <4               | <4             |
| <i>Cerebrovascular disease</i>              | 0 (0.0)         | <4               | 0 (0.0)          | 0 (0.0)          | <4               | <4             |
| <i>Diseases of veins and lymphatics</i>     | 0 (0.0)         | 0 (0.0)          | 0 (0.0)          | 0 (0.0)          | 0 (0.0)          | 0 (0.0)        |
| Pneumonia and pleurisy (n, %)               | 0 (0.0)         | <4               | 0 (0.0)          | <4               | <4               | 5 (3.5)        |
| <i>Pneumonia and influenza</i>              | <4              | 0 (0.0)          | 0 (0.0)          | <4               | <4               | <4             |
| <i>COPD and allied conditions</i>           | <4              | 0 (0.0)          | 0 (0.0)          | 0 (0.0)          | <4               | <4             |
| <i>Other diseases of respiratory system</i> | 0 (0.0)         | <4               | 0 (0.0)          | <4               | 0 (0.0)          | <4             |
| Gastrointestinal (n, %)                     | 0 (0.0)         | <4               | 0 (0.0)          | <4               | 0 (0.0)          | <4             |
| Liver (n, %)                                | <4              | 0 (0.0)          | 0 (0.0)          | 0 (0.0)          | <4               | <4             |
| Renal (n, %)                                | 0 (0.0)         | 0 (0.0)          | 0 (0.0)          | 0 (0.0)          | 0 (0.0)          | 0 (0.0)        |
| Edema (n, %)                                | 0 (0.0)         | 0 (0.0)          | 0 (0.0)          | 0 (0.0)          | 0 (0.0)          | 0 (0.0)        |
| Metabolic alteration (n, %)                 | 0 (0.0)         | <4               | 4 (14.8)         | 0 (0.0)          | <4               | 6 (4.2)        |
| Years in treatment (mean, SD)               | 1.9 (1.7)       | 2.4 (1.7)        | 2.5 (1.9)        | 1.1 (0.9)        | 1.5 (1.3)        | 1.9 (1.6)      |

**Supporting Table S5. Mean daily dosages**

|           | <b>2<sup>nd</sup> line cohort<br/>Mean daily<br/>dosage (mg)</b> | <b>3<sup>rd</sup> line cohort<br/>Mean daily<br/>dosage (mg)</b> | <b>Label<br/>recommended,<br/>SMPC (mg/die)</b> |
|-----------|------------------------------------------------------------------|------------------------------------------------------------------|-------------------------------------------------|
| Bosutinib | 340.70                                                           | 382.16                                                           | 500*                                            |
| Dasatinib | 92.69                                                            | 81.42                                                            | 100                                             |
| Imatinib  | 395.55                                                           | 481.51                                                           | 400                                             |
| Nilotinib | 609.19                                                           | 656.44                                                           | 800*                                            |
| Ponatinib | 31.81                                                            | 37.88                                                            | 45                                              |

\* recommended dosage starting from the second-line treatment
